# Supplementary material for: Towards shape-oriented Bi-doped CoCr2O4 nanoparticles from theoretical and experimental perspectives: structural, morphological, optical, electrical and magnetic properties
Source: Royal Society of Chemistry journal article supplement (doi:10.1039/d1tc00872b), 2021-01-01
Supplement: d1tc00872b1.pdf [file d1tc00872b1.pdf]

# **Towards shape-oriented Bi-doped $\text{CoCr}_2\text{O}_4$ nanoparticles from theoretical and experimental perspective: Structural, Morphological, Optical, Electrical and Magnetic properties**

K. Manjunatha<sup>1,8</sup>, V. Jagadeesha Angadi<sup>2\*</sup>, M. C. Oliveira<sup>3</sup>, S. R. de Lazaro<sup>4</sup>, E. longo<sup>5</sup>,  
R. A. P. Ribeiro<sup>6\*</sup>, S. O. Manjunatha,<sup>7</sup> N. H. Ayachith<sup>9</sup>

<sup>1</sup>*Department of Physics, School of Engineering, Presidency University, Bangalore-560064, India*

<sup>2</sup>*Department of Physics, P.C. Jabin Science College, Hubballi-580031, India*

<sup>3</sup>*LSQM – Laboratory of Chemical Synthesis of Materials – Department of Materials Engineering, Federal University of Rio Grande do Norte – UFRN, P.O. Box 1524, Natal RN, Brazil.*

<sup>4</sup>*Department of Chemistry, State University of Ponta Grossa, Av. General Carlos Cavalcanti, 4748, Zip code: 84030-900, Ponta Grossa, PR, Brazil*

<sup>5</sup>*CDMF-UFSCar, Universidade Federal de São Carlos, PO Box 676, 13565–905 São Carlos, SP, Brazil*

<sup>6</sup>*Department of Chemistry, Minas Gerais State University, Av. Paraná, 3001, Zip-Code: 35501-170, Divinópolis, MG, Brazil*

<sup>7</sup>*Department of Physics, FMPS, Ramaiah University of Applied Sciences, Bengaluru-560058, India*

<sup>8</sup>*Material Research Centre, School of Engineering, Presidency University, Bangalore-560064, India*

<sup>9</sup>*KLE Technological University, Hubballi-580031, India*

**\*Corresponding author: [renan.ribeiro@uemg.br](mailto:renan.ribeiro@uemg.br); [jagadeeshbub@gmail.com](mailto:jagadeeshbub@gmail.com)**

## Supporting Information

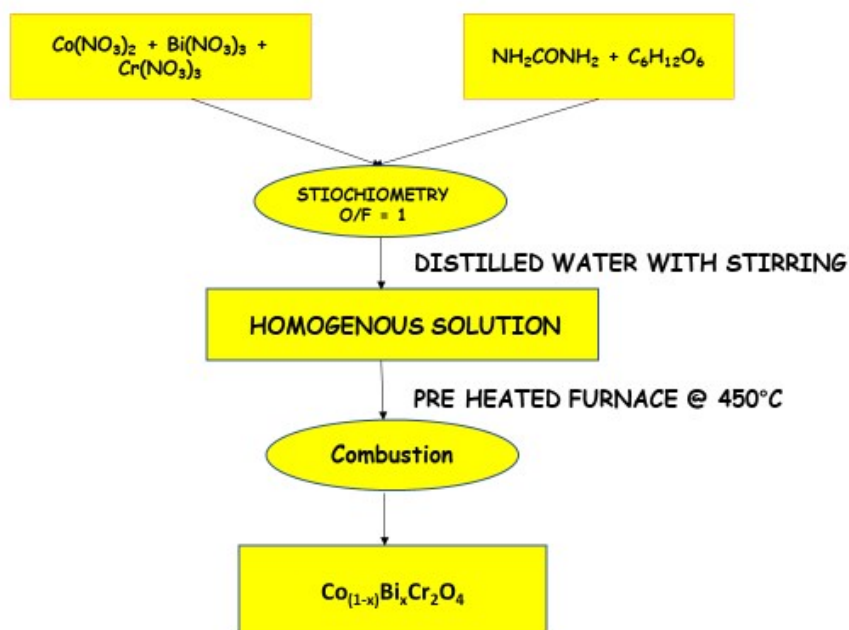

**Figure S1:** Solution combustion technique flow chart for  $\text{Co}_{(1-x)}\text{Bi}_x\text{Cr}_2\text{O}_4$  (where,  $x = 0.00, 0.05, 0.10$ ) nanoparticles.

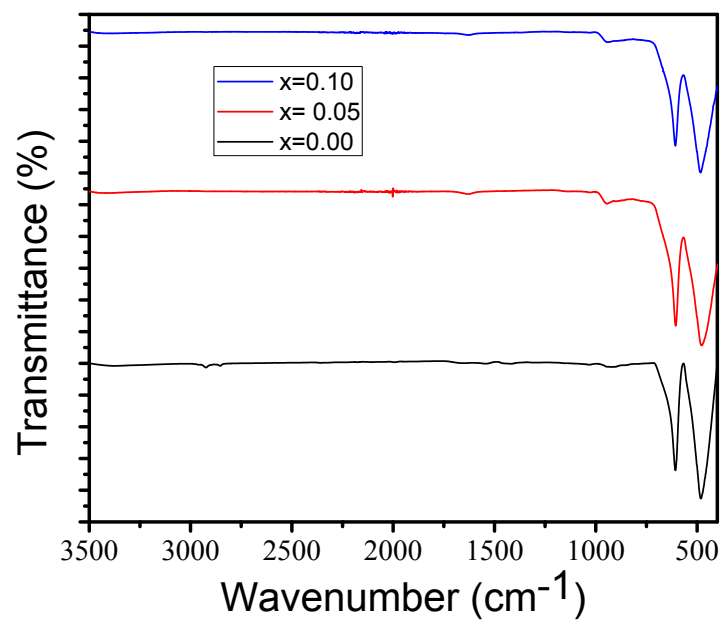

**Figure S2:** FTIR spectra of  $\text{Co}_{(1-x)}\text{Bi}_x\text{Cr}_2\text{O}_4$  (where,  $x=0.00, 0.05, 0.10$ ) nanoparticles

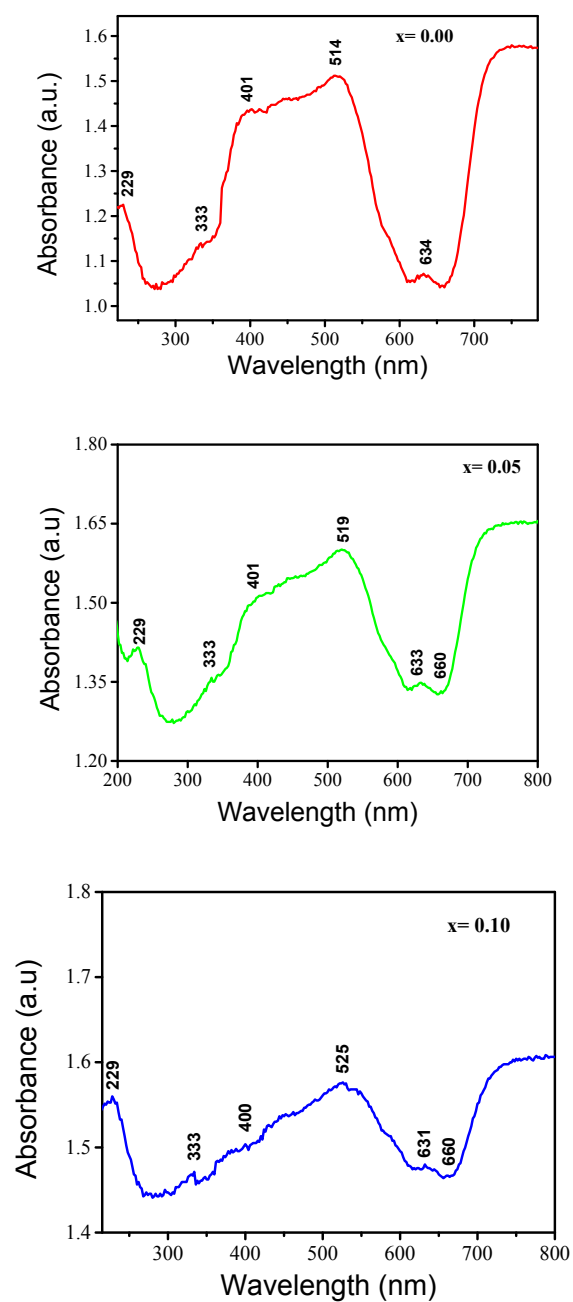

**Figure S3:** UV-Visible absorbance spectra of  $\text{Co}_{(1-x)}\text{Bi}_x\text{Cr}_2\text{O}_4$  (where,  $x = 0, 0.05, 0.10$ ) nanoparticles

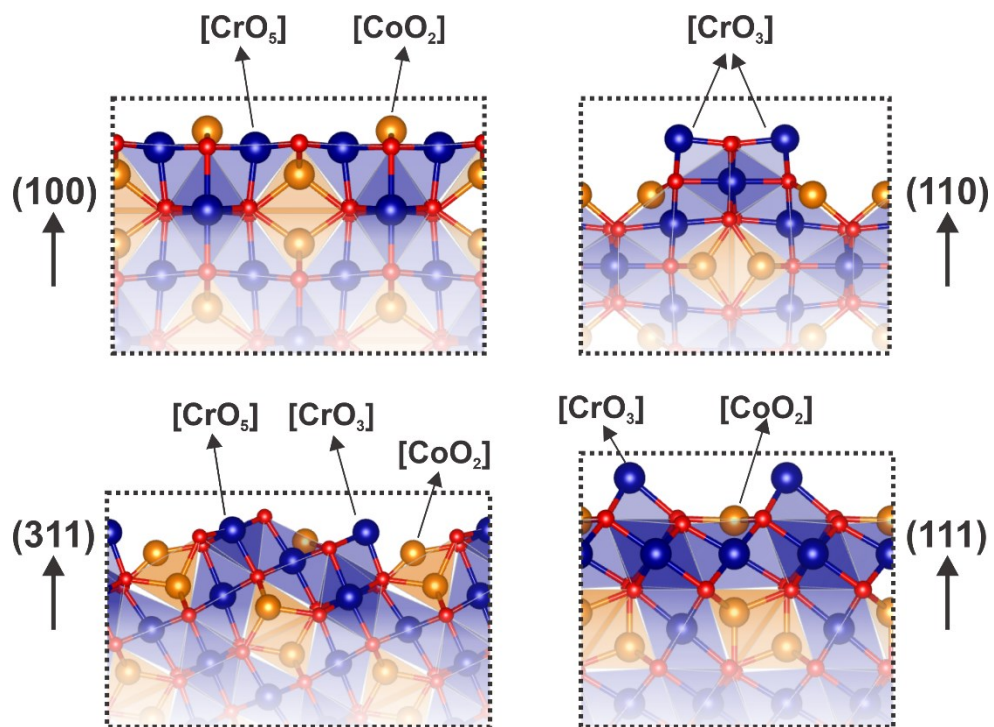

**Figure S4.** Schematic representation of chemical environment for  $\text{CoCr}_2\text{O}_4$  (100), (110), (111), and (311) surfaces.

**Table S1:** Vibration bands,  $K_T$  and  $K_O$  values of  $\text{Co}_{(1-x)}\text{Bi}_x\text{Cr}_2\text{O}_4$  (where,  $x= 0.00, 0.05, 0.10$ ) nanoparticles.

| $\text{Bi}^{3+}$<br>concentration | Vibration band<br>( $\text{cm}^{-1}$ ) at the<br>tetrahedral site | Vibration band<br>( $\text{cm}^{-1}$ ) at<br>octahedral site | $K_T$               | $K_O$               |
|-----------------------------------|-------------------------------------------------------------------|--------------------------------------------------------------|---------------------|---------------------|
| $x= 0$                            | 606.71                                                            | 480.71                                                       | $2.652 \times 10^5$ | $1.665 \times 10^5$ |
| $x= 0.05$                         | 604.93                                                            | 478.78                                                       | $2.636 \times 10^5$ | $1.651 \times 10^5$ |
| $x= 0.10$                         | 608.50                                                            | 482.79                                                       | $2.667 \times 10^5$ | $1.679 \times 10^5$ |

**Table S2:** EDS analysis of  $\text{Co}_{(1-x)}\text{Bi}_x\text{Cr}_2\text{O}_4$  (where,  $x= 0, 0.05, 0.10$ ) nanoparticles

| Identified elements | Theoretical stoichiometry | Experimental stoichiometry from EDS analysis |
|---------------------|---------------------------|----------------------------------------------|
| Cr                  | 1                         | 1                                            |
| Co                  | 1                         | 1                                            |
| Bi                  | 0                         | 0                                            |
| Cr                  | 1                         | 1                                            |
| Co                  | 0.95                      | 0.946                                        |
| Bi                  | 0.05                      | 0.054                                        |
| Cr                  | 1                         | 1                                            |
| Co                  | 0.90                      | 0.8831                                       |
| Bi                  | 0.10                      | 0.1168                                       |

**Table S3.** Calculated M-O bond distances in Å (M = Co, Sc, and Cr), bond length distortion indexes ( $\Delta_d$ ) in Å, and bond angle variances (BAV) in degree, for the pure and Bi-doped  $\text{CoCr}_2\text{O}_4$  materials.

| Models                                              |                     | M-O        | $\Delta_d$                                                                       | BAV   |       |
|-----------------------------------------------------|---------------------|------------|----------------------------------------------------------------------------------|-------|-------|
| $\text{CoCr}_2\text{O}_4$                           | [CoO <sub>4</sub> ] | 1.995 (4x) | 0.00                                                                             | 0.0   |       |
|                                                     | [CrO <sub>6</sub> ] | 1.994 (6x) | 0.00                                                                             | 41.69 |       |
| $\text{Co}_{(1-x)}\text{Bi}_x\text{Cr}_2\text{O}_4$ | [CoO <sub>4</sub> ] | Co(1)      | 1.994 (3x)<br>2.086 (1x)                                                         | 0.01  | 10.30 |
|                                                     |                     | Co(2)      | 1.970 (1x)<br>2.010 (1x)<br>2.026 (2x)                                           | 0.01  | 5.28  |
|                                                     |                     | Co(3)      | 1.973 (2x)<br>2.008 (2x)                                                         | 0.01  | 1.93  |
|                                                     |                     | Co(4)      | 1.992 (4x)                                                                       | 0.00  | 0.37  |
|                                                     | [BiO <sub>4</sub> ] | 2.180 (4x) | 0.00                                                                             | 0.02  |       |
|                                                     | [CrO <sub>6</sub> ] | Cr(1)      | 1.974 (1x)<br>1.986 (1x)<br>2.004 (2x)<br>2.019 (2x)                             | 0.01  | 59.64 |
|                                                     |                     | Cr(2)      | 1.969 (1x)<br>1.989 (1x)<br>1.992 (1x)<br>1.997 (1x)<br>2.020 (2x)               | 0.01  | 57.70 |
|                                                     |                     | Cr(3)      | 1.950 (1x)<br>1.993 (2x)<br>2.012 (1x)<br>2.030 (2x)                             | 0.01  | 49.06 |
|                                                     |                     | Cr(4)      | 1.929 (1x)<br>1.988 (1x)<br>1.992 (1x)<br>2.021 (1x)<br>2.039 (1x)<br>2.049 (1x) | 0.02  | 75.81 |
|                                                     |                     | Cr(5)      | 1.901 (1x)<br>2.007 (2x)<br>2.012 (2x)<br>2.053 (1x)                             | 0.02  | 48.36 |
|                                                     |                     | Cr(6)      | 1.965 (1x)<br>1.985 (2x)<br>2.009 (2x)<br>2.022 (1x)                             | 0.01  | 33.42 |



**Table S4.** Calculated Surface Energy (J/m<sup>2</sup>) for (100), (110), (111) and (311) surfaces of CoCr<sub>2</sub>O<sub>4</sub> as function of the Cr and Co chemical potential (eV).

| (100)                 |      | $\Delta\mu_{Co}$ (eV) |      |      |      |      |      |      |      |      |      |      |      |       |
|-----------------------|------|-----------------------|------|------|------|------|------|------|------|------|------|------|------|-------|
|                       |      | -6                    | -5.5 | -5   | -4.5 | -4   | -3.5 | -3   | -2.5 | -2   | -1.5 | -1   | -0.5 | 0     |
| $\Delta\mu_{Cr}$ (eV) | -3   | 2.06                  | 1.95 | 1.83 | 1.72 | 1.60 | 1.49 | 1.38 | 1.26 | 1.15 | 1.03 | 0.92 | 0.80 | 0.69  |
|                       | -2.5 | 2.06                  | 1.95 | 1.83 | 1.72 | 1.60 | 1.49 | 1.38 | 1.26 | 1.15 | 1.03 | 0.92 | 0.80 | 0.69  |
|                       | -2   | 2.06                  | 1.95 | 1.83 | 1.72 | 1.60 | 1.49 | 1.38 | 1.26 | 1.15 | 1.03 | 0.92 | 0.80 | 0.69  |
|                       | -1.5 | 2.06                  | 1.95 | 1.83 | 1.72 | 1.60 | 1.49 | 1.38 | 1.26 | 1.15 | 1.03 | 0.92 | 0.80 | 0.69  |
|                       | -1   | 2.06                  | 1.95 | 1.83 | 1.72 | 1.60 | 1.49 | 1.38 | 1.26 | 1.15 | 1.03 | 0.92 | 0.80 | 0.69  |
|                       | -0.5 | 2.06                  | 1.95 | 1.83 | 1.72 | 1.60 | 1.49 | 1.38 | 1.26 | 1.15 | 1.03 | 0.92 | 0.80 | 0.69  |
|                       | 0    | 2.06                  | 1.95 | 1.83 | 1.72 | 1.60 | 1.49 | 1.38 | 1.26 | 1.15 | 1.03 | 0.92 | 0.80 | 0.69  |
| (110)                 |      | $\Delta\mu_{Co}$ (eV) |      |      |      |      |      |      |      |      |      |      |      |       |
|                       |      | -6                    | -5.5 | -5   | -4.5 | -4   | -3.5 | -3   | -2.5 | -2   | -1.5 | -1   | -0.5 | 0     |
| $\Delta\mu_{Cr}$ (eV) | -3   | 0.67                  | 0.67 | 0.67 | 0.67 | 0.67 | 0.67 | 0.67 | 0.67 | 0.67 | 0.67 | 0.67 | 0.67 | 0.67  |
|                       | -2.5 | 0.83                  | 0.83 | 0.83 | 0.83 | 0.83 | 0.83 | 0.83 | 0.83 | 0.83 | 0.83 | 0.83 | 0.83 | 0.83  |
|                       | -2   | 1.00                  | 1.00 | 1.00 | 1.00 | 1.00 | 1.00 | 1.00 | 1.00 | 1.00 | 1.00 | 1.00 | 1.00 | 1.00  |
|                       | -1.5 | 1.16                  | 1.16 | 1.16 | 1.16 | 1.16 | 1.16 | 1.16 | 1.16 | 1.16 | 1.16 | 1.16 | 1.16 | 1.16  |
|                       | -1   | 1.32                  | 1.32 | 1.32 | 1.32 | 1.32 | 1.32 | 1.32 | 1.32 | 1.32 | 1.32 | 1.32 | 1.32 | 1.32  |
|                       | -0.5 | 1.48                  | 1.48 | 1.48 | 1.48 | 1.48 | 1.48 | 1.48 | 1.48 | 1.48 | 1.48 | 1.48 | 1.48 | 1.48  |
|                       | 0    | 1.64                  | 1.64 | 1.64 | 1.64 | 1.64 | 1.64 | 1.64 | 1.64 | 1.64 | 1.64 | 1.64 | 1.64 | 1.64  |
| (111)                 |      | $\Delta\mu_{Co}$ (eV) |      |      |      |      |      |      |      |      |      |      |      |       |
|                       |      | -6                    | -5.5 | -5   | -4.5 | -4   | -3.5 | -3   | -2.5 | -2   | -1.5 | -1   | -0.5 | 0     |
| $\Delta\mu_{Cr}$ (eV) | -3   | 0.77                  | 0.77 | 0.77 | 0.77 | 0.77 | 0.77 | 0.77 | 0.77 | 0.77 | 0.77 | 0.77 | 0.77 | 0.77  |
|                       | -2.5 | 0.90                  | 0.90 | 0.90 | 0.90 | 0.90 | 0.90 | 0.90 | 0.90 | 0.90 | 0.90 | 0.90 | 0.90 | 0.90  |
|                       | -2   | 1.03                  | 1.03 | 1.03 | 1.03 | 1.03 | 1.03 | 1.03 | 1.03 | 1.03 | 1.03 | 1.03 | 1.03 | 1.03  |
|                       | -1.5 | 1.16                  | 1.16 | 1.16 | 1.16 | 1.16 | 1.16 | 1.16 | 1.16 | 1.16 | 1.16 | 1.16 | 1.16 | 1.16  |
|                       | -1   | 1.30                  | 1.30 | 1.30 | 1.30 | 1.30 | 1.30 | 1.30 | 1.30 | 1.30 | 1.30 | 1.30 | 1.30 | 1.30  |
|                       | -0.5 | 1.43                  | 1.43 | 1.43 | 1.43 | 1.43 | 1.43 | 1.43 | 1.43 | 1.43 | 1.43 | 1.43 | 1.43 | 1.43  |
|                       | 0    | 1.56                  | 1.56 | 1.56 | 1.56 | 1.56 | 1.56 | 1.56 | 1.56 | 1.56 | 1.56 | 1.56 | 1.56 | 1.56  |
| (311)                 |      | $\Delta\mu_{Co}$ (eV) |      |      |      |      |      |      |      |      |      |      |      |       |
|                       |      | -6                    | -5.5 | -5   | -4.5 | -4   | -3.5 | -3   | -2.5 | -2   | -1.5 | -1   | -0.5 | 0     |
| $\Delta\mu_{Cr}$ (eV) | -3   | 1.23                  | 1.13 | 1.02 | 0.92 | 0.82 | 0.71 | 0.61 | 0.51 | 0.40 | 0.30 | 0.20 | 0.09 | -0.01 |
|                       | -2.5 | 1.37                  | 1.26 | 1.16 | 1.06 | 0.95 | 0.85 | 0.75 | 0.64 | 0.54 | 0.44 | 0.33 | 0.23 | 0.13  |
|                       | -2   | 1.51                  | 1.40 | 1.30 | 1.20 | 1.09 | 0.99 | 0.89 | 0.78 | 0.68 | 0.58 | 0.47 | 0.37 | 0.27  |
|                       | -1.5 | 1.64                  | 1.54 | 1.44 | 1.33 | 1.23 | 1.13 | 1.02 | 0.92 | 0.82 | 0.71 | 0.61 | 0.51 | 0.40  |
|                       | -1   | 1.78                  | 1.68 | 1.57 | 1.47 | 1.37 | 1.26 | 1.16 | 1.06 | 0.95 | 0.85 | 0.75 | 0.64 | 0.54  |
|                       | -0.5 | 1.92                  | 1.82 | 1.71 | 1.61 | 1.51 | 1.40 | 1.30 | 1.20 | 1.09 | 0.99 | 0.89 | 0.78 | 0.68  |
|                       | 0    | 2.06                  | 1.95 | 1.85 | 1.75 | 1.64 | 1.54 | 1.44 | 1.33 | 1.23 | 1.13 | 1.02 | 0.92 | 0.82  |
